# Supplementary material for: How palladium inhibits CO poisoning during electrocatalytic formic acid oxidation and carbon dioxide reduction
Source: PubMed Central journal article supplement (PMC8748733; doi:10.1038/s41467-021-27793-5), 2022-01-10
Supplement: 41467_2021_27793_MOESM1_ESM.pdf [file 41467_2021_27793_MOESM1_ESM.pdf]

# 1 Supporting Information

## 2 How palladium inhibits CO poisoning during electrocatalytic formic acid 3 oxidation and carbon dioxide reduction

4 Xiaoting Chen, † Laura P. Granda-Marulanda, † Ian T. McCrum, † and Marc T.M. Koper\*†

5 †Leiden Institute of Chemistry, Leiden University, PO Box 9502, 2300 RA, Leiden (the Netherlands)

## 6 Experimental Details

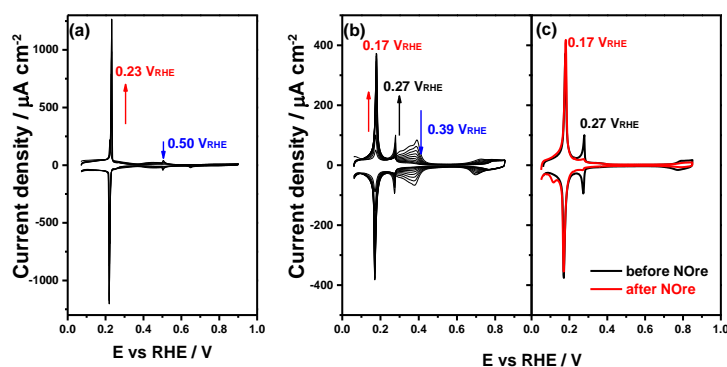

7

8

9 **Figure S1.** Cyclic voltammograms for (a) Pt(111) and (b) Pt(100) in 0.1 M H<sub>2</sub>SO<sub>4</sub> + 0.1 mM PdSO<sub>4</sub>, recorded  
10 in successive stages during Pd deposition experiment. Scan rate: 50 mV s<sup>-1</sup>. Arrows indicate the evolution with  
11 time. (c) Stable cyclic voltammograms of Pd/Pt(100) electrode in 0.1 M H<sub>2</sub>SO<sub>4</sub> before NO adsorption and  
12 reductive stripping (black line) and the same Pd/Pt(100) electrode in 0.1 M H<sub>2</sub>SO<sub>4</sub> after NO adsorption and  
13 reductive stripping (red line).

14 Figure S1a shows the effect of the progressive accumulation of palladium on the voltammetric profile of Pt(111)  
15 electrode during the electrochemical deposition of palladium monolayer. At the shortest deposition times, the  
16 presence of palladium on the surface is reflected in the growth of a sharp adsorption state at 0.23 V<sub>RHE</sub>,  
17 simultaneously with the progressive decrease of the characteristic adsorption states of Pt(111) in 0.1 M H<sub>2</sub>SO<sub>4</sub>.  
18 In addition, the presence of the characteristic spike of Pt(111) at 0.50 V<sub>RHE</sub> strongly suggests the existence of  
19 wide Pt(111) domains. Increasing deposition cycles lead to the contributions from the Pt(111) domains around  
20 0.50 V<sub>RHE</sub> to become blocked progressively. A previous study using in situ scanning tunnelling microscopy  
21 (STM) showed a complete pseudomorphic monolayer of Pd is formed prior to bulk deposition during  
22 electrochemical deposition of Pd on Pt(111).<sup>1</sup> The voltammetric charge of (bi)sulfate adsorption at 0.23 V<sub>RHE</sub>  
23 can be related in a quantitative way to the palladium coverage and increases to a charge value of 320  $\mu\text{C cm}^{-2}$   
24 for Pd<sub>ML</sub>Pt(111).<sup>2,3</sup>

25 Figure S1b shows the characteristic adsorption peak of Pt(100) electrode at 0.39 V<sub>RHE</sub> progressively diminishes  
 26 whereas a new sharp adsorption state appears at 0.17 V<sub>RHE</sub>. The experimental result is interpreted as the  
 27 progressive blocking of the Pt(100) substrate sites by a first monolayer of palladium atoms directly deposited  
 28 on the Pt(100) substrate. As the deposition continues a new feature appears at 0.27 V<sub>RHE</sub> while the peak at 0.39  
 29 V<sub>RHE</sub> corresponding to the remaining Pt(100) unblocked sites has not been completely suppressed. The  
 30 appearance of a second adsorption state at 0.27 V<sub>RHE</sub> for palladium deposited on Pt(100) substrates is associated  
 31 to the growth of palladium in second, third and further layers. The easiest way to obtain a Pt(100) electrode  
 32 fully covered by a single palladium monolayer is to deposit palladium until all the Pt(100) sites are blocked and  
 33 then remove the excess by the NO treatment described above:<sup>4</sup>

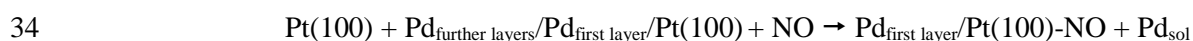

35 in which Pd<sub>first layer</sub> means palladium adatoms in the first monolayer, Pd<sub>further layers</sub> is the second and multilayers,  
 36 and Pd<sub>sol</sub> represents stable palladium species in solution.

37 Figure S1c shows the final voltammogram in 0.1 M H<sub>2</sub>SO<sub>4</sub> (red line): a characteristic peak at 0.17 V<sub>RHE</sub> related  
 38 to the (bi)sulfate anion adsorption on Pd monolayer is observed, the contributions assigned to the second stage  
 39 of Pd deposition at 0.27 V<sub>RHE</sub> and uncovered Pt(100) electrode domain at 0.39 V<sub>RHE</sub> have been eliminated. The  
 40 voltammogram of Pd<sub>ML</sub>Pt(100) is stable upon successive cycles, suggesting that the monolayer does not undergo  
 41 further modification.

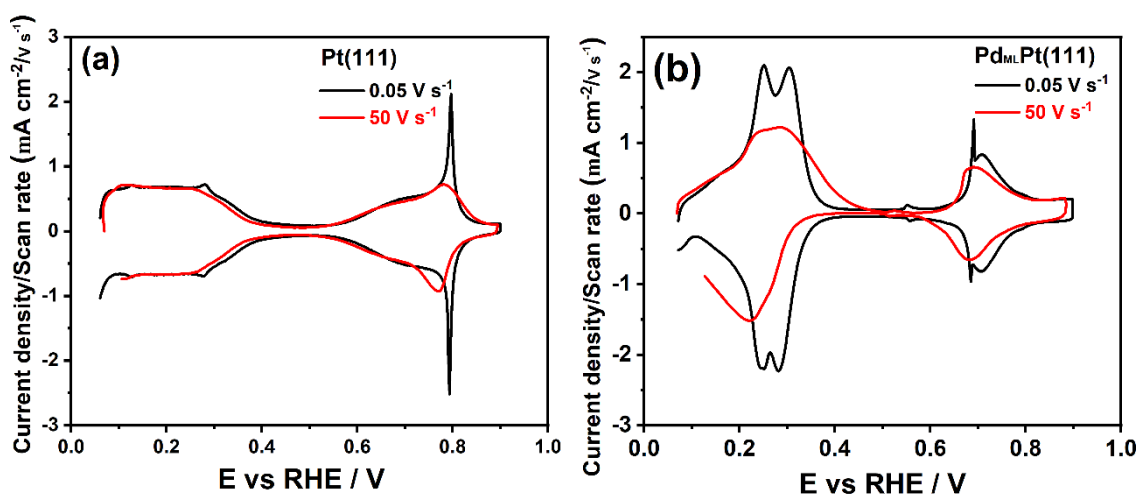

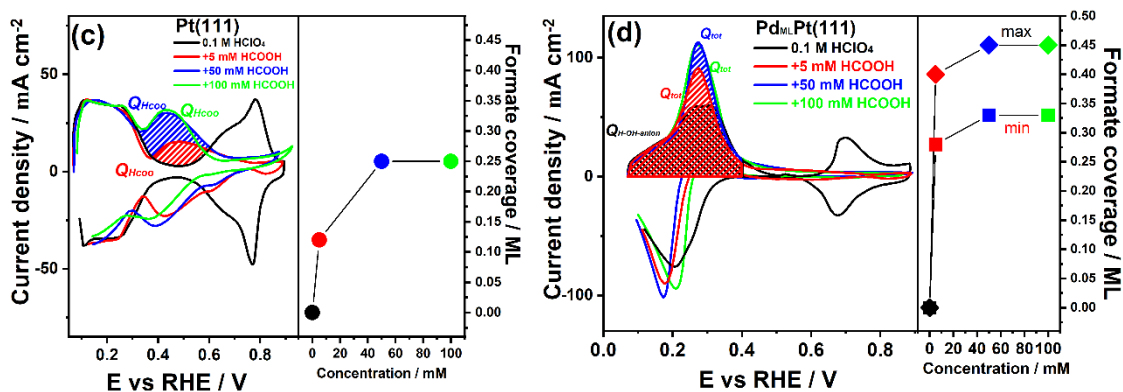

44

45 **Figure S2.** Voltammograms of (a) Pt(111) and (b) Pd<sub>ML</sub>Pt(111) electrode in 0.1 M HClO<sub>4</sub> recorded at 0.05 V s<sup>-1</sup>  
 46 <sup>1</sup> (black line) and 50 V s<sup>-1</sup> (red line), resp. Corresponding voltammograms of (c) Pt(111) and (d) Pd<sub>ML</sub>Pt(111)  
 47 electrode in 0.1 M HClO<sub>4</sub> + x mM HCOOH recorded at 50 V s<sup>-1</sup>, resp. The insert at right side represents the  
 48 correlation between the formate coverage and formic acid concentration, resp.

49

50

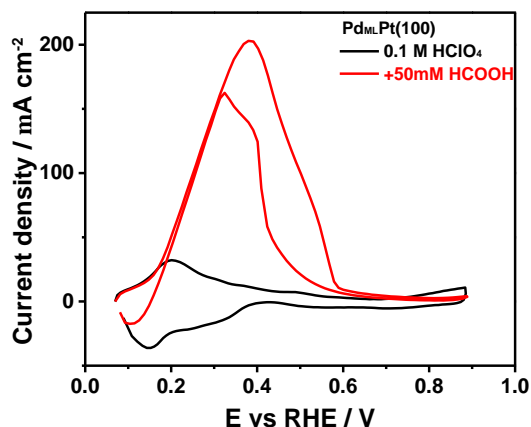

51

52 **Figure S3.** Voltammograms of Pd<sub>ML</sub>Pt(100) electrode in 0.1 M HClO<sub>4</sub> (black line) and 0.1 M HClO<sub>4</sub> + 50 mM  
 53 HCOOH, recorded at 50 V s<sup>-1</sup>.

54 Figure S4 shows the oxidation of formic acid on Pd<sub>ML</sub>Pt(100) electrode in 0.1 M HClO<sub>4</sub> + 50 mM HCOOH at a  
 55 high scan rate of 50 V s<sup>-1</sup>. The current corresponding to the oxidation of formic acid process is much larger than  
 56 the current corresponding to the reversible formate adsorption/desorption so that this latter contribution cannot  
 57 be separated from the voltammogram. The results suggest a much faster kinetics of formic acid oxidation  
 58 reaction on Pd<sub>ML</sub>Pt(100) than that on Pd<sub>ML</sub>Pt(111) electrode.

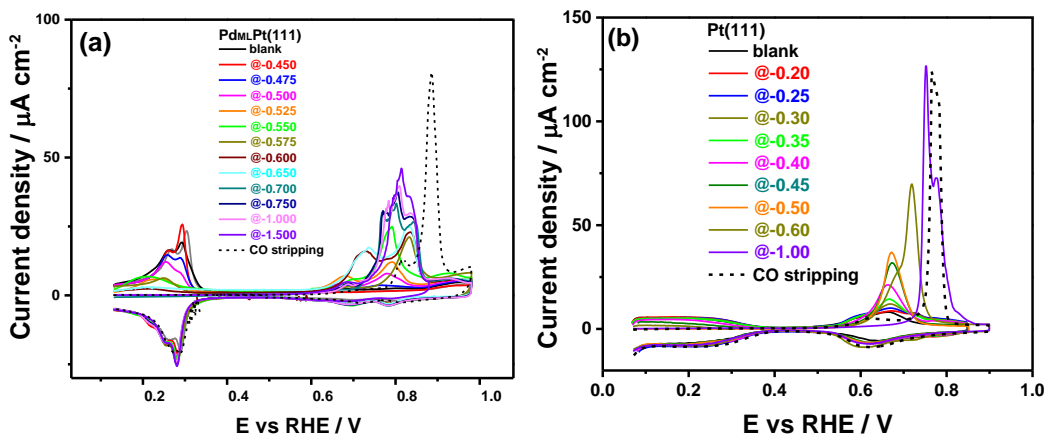

59

60 **Figure S4.** Voltammograms for the oxidative stripping of CO adlayer produced on (a) Pd<sub>ML</sub>Pt(111) and (b)  
 61 Pt(111) electrode after doing CO<sub>2</sub> reduction at different vertex potentials in pH=3.0 (0.001M HClO<sub>4</sub>/0.099M  
 62 KClO<sub>4</sub>) solution saturated with CO<sub>2</sub>, recorded at 10 mV s<sup>-1</sup>. A CO stripping experiment result (dashed line) of  
 63 a saturated CO adlayer is performed under identical condition for comparison.

64 Figure S5 shows the voltammograms for the oxidative stripping of CO adlayer produced during CO<sub>2</sub> reduction  
 65 on the Pd<sub>ML</sub>Pt(111) and Pt(111) electrode, resp. Figure S5a shows anodic peaks between 0.650 and 0.900 V<sub>RHE</sub>  
 66 are observed when doing CO<sub>2</sub> reduction on the Pd<sub>ML</sub>Pt(111) electrode by increasing the vertex potential in steps  
 67 of 0.025 V from -0.475 V<sub>RHE</sub>. These anodic peaks correspond to the oxidation of adsorbed CO formed during  
 68 CO<sub>2</sub> reduction. It is reasonable to assume that there is no CO formation from CO<sub>2</sub> reduction on Pd<sub>ML</sub>Pt(111)  
 69 surface at lower overpotentials than that of -0.475V<sub>RHE</sub>. In Figure S4a, the production of the CO is shown to  
 70 increase with increasing the overpotential for CO<sub>2</sub> reduction: for the overpotential of -0.475, -0.500, -0.525, -  
 71 0.550, -0.575, -0.600, -0.650, -0.700 and -0.750 V<sub>RHE</sub>, the coverage of CO adlayer is 0.13, 0.19, 0.22, 0.29, 0.31,  
 72 0.52, 0.58, 0.71 and 0.72 ML, resp. As can be seen from Figure S4a, the onset potential and shape of CO adlayer  
 73 oxidation peak on the Pd<sub>ML</sub>Pt(111) electrode strongly depends on its coverage. The full CO adlayer is stripped  
 74 off at 0.90 V<sub>RHE</sub> (dashed line); such a high coverage is not obtained during CO<sub>2</sub> reduction. The subsequent  
 75 scan indicates the entire CO adlayer on Pd<sub>ML</sub>Pt(111) electrode was stripped in a single positive-going sweep  
 76 and retains the well-defined hydrogen adsorption and anion desorption features in the low-potential region.

77 In the case of the Pt(111) electrode, reducing CO<sub>2</sub> to adsorbed CO starts at -0.25 V<sub>RHE</sub> and the surface is poisoned  
 78 when the negative vertex potential reaches -0.60 V<sub>RHE</sub>. Figure S4b shows that with increasing overpotential for  
 79 CO<sub>2</sub> reduction on Pt(111), the formation of the CO increases: for the overpotential of -0.25, -0.30, -0.35, -0.40,  
 80 -0.50, -0.60 and -1.0 V<sub>RHE</sub>, the coverage of CO adlayer is 0.23, 0.37, 0.37, 0.47, 0.59, 0.63 and 0.66 ML, resp.  
 81 The subsequent scan shows the recovery of the Pt(111) surface after the CO adlayer oxidation.

## 82 Computational Details

### 83 Free energies calculations

84 The adsorption free energies of \*H, \*CO, \*OCHO and \*COOH were calculated from formic acid in solution,  
85 (HCOOH (aq)) for the formic acid oxidation reaction, and from carbon dioxide in gas-phase, (CO<sub>2</sub> (g)) for the  
86 CO<sub>2</sub> reduction reaction. Below we show how the free energies are calculated in both cases.

### 87 Formic Acid oxidation

88 The following chemical equations show how the adsorption free energies of the different adsorbates are  
89 calculated for formic acid oxidation.

90

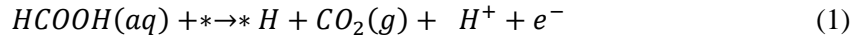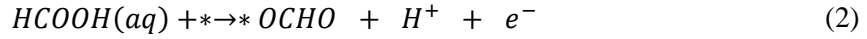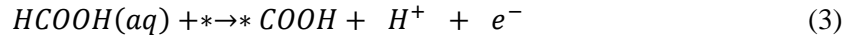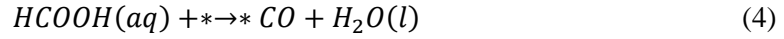

91

92 where, \* represents the adsorption site. The free energies of adsorption are then calculated as shown below

$$G_{*H}^{ads} = G_{*H} + G_{CO_2(g)} + \frac{1}{2}G_{H_2(g)} - G_{HCOOH(aq)} - G_* \quad (5)$$

$$G_{*OCHO}^{ads} = G_{*OCHO} + \frac{1}{2}G_{H_2(g)} - G_{HCOOH(aq)} - G_* \quad (6)$$

$$G_{*COOH}^{ads} = G_{*COOH} + \frac{1}{2}G_{H_2(g)} - G_{HCOOH(aq)} - G_* \quad (7)$$

$$G_{*CO}^{ads} = G_{*CO} + G_{H_2O(l)} - G_{HCOOH(aq)} - G_* \quad (8)$$

93 Each free energy is calculated as  $G = EDFT + ZPE + TS$ , where EDFT is the energy obtained from the DFT  
94 calculation at 0K, ZPE is the zero-point energy determined from the vibrational frequencies obtained using the  
95 harmonic-oscillator approximation. The TS is the temperature at  $T = 298.15$  K times the entropy (S) term  
96 containing i) all the contributions (translational, rotational and vibrational) for the free energies of species in the

97 gas phase and is taken from standard thermodynamic tables<sup>5</sup> and ii) for the free energies of adsorbed species  
 98 containing vibrational contributions. The free energy of the surface,  $G_*$ , is the energy from DFT at 0 K. The  
 99 free energies of  $\text{CO}_2(\text{g})$  and  $\text{CO}(\text{g})$  are corrected by -0.19 and 0.24 eV, these corrections come from the  
 100 difference between the experimental standard free energy of formation  $\Delta G_{\text{Exp}}^\circ$  and the DFT formation  
 101 energy  $\Delta G_{\text{DFT}}^\circ$ , as PBE does not describe well their formation energies.<sup>6-8</sup>

## 102 Free energy of solution phase HCOOH (aq)

103 The solution phase free energy of HCOOH (aq) was calculated using the SHE equilibrium redox potential of  
 104  $\text{CO}_2(\text{g}) + 2\text{H}^+ + 2\text{e}^- \rightarrow \text{HCOOH}(\text{aq})$ ,  $E^\circ = -0.11$  V vs SHE,<sup>9</sup> where the free energy of  $\text{CO}_2(\text{g})$  is calculated  
 105 within DFT. This was used to solve for the standard free energy of formic acid in solution phase,  $\Delta G_{\text{HCOOH}}^\circ(\text{aq})$   
 106 and ultimately to solve for the aqueous free energy at the experimental conditions, see below.

$$\Delta G_{\text{HCOOH}}^\circ(\text{aq}) = G_{\text{CO}_2(\text{g})}^\circ + 2G_{\text{H}^+}^\circ - 2|e|U \quad (9)$$

107 where  $U = E^\circ = -0.11$  V,<sup>9</sup> and  $G_{\text{H}^+}^\circ = \frac{1}{2}G_{\text{H}_2(\text{g})}^\circ$  at 0 V in the SHE scale.

108 The standard solution phase free energy,  $\Delta G_{\text{HCOOH}}^\circ(\text{aq})$ , was then used to obtain the free energy of formic  
 109 acid,  $\Delta G_{\text{HCOOH}}$ , at the experimental conditions of 0.1M  $\text{HClO}_4$  and 50 mM HCOOH, following the Nernst  
 110 equation.

$$\Delta G_{\text{HCOOH}} = \Delta G_{\text{HCOOH}}^\circ(\text{aq}) + k_b T \ln(Cf) \quad (10)$$

111  $Cf$  is the actual concentration of HCOOH and is obtained using the pKa of formic acid, 3.94 and the starting  
 112 concentrations of  $\text{HClO}_4$  and HCOOH.

113 The free energies of the protons and electrons as expressed in the adsorption reactions, equations 1 to 4, were  
 114 calculated using the computational hydrogen electrode (CHE) model.<sup>10</sup>

## 115 Formate coadsorption with \*H, \*CO and \*COOH

116 To investigate the effect of formate coverage on the free energy of adsorption of \*H, \*CO and \*COOH we  
 117 calculated the energies from HCOOH (aq) and  $n$  molecules of formate \*OCHO adsorbed on the surface. For  
 118 example, the adsorption of \*COOH at different formate coverages is calculated using the following chemical  
 119 reaction

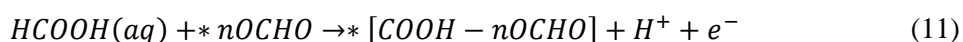

120

121 and its free energy of adsorption

$$G_{*[\text{COOH}-n\text{OCHO}]}^{ads} = G_{*[\text{COOH}-n\text{OCHO}]} + \frac{1}{2}G_{\text{H}_2(g)} - G_{\text{HCOOH}(aq)} - G_{*n\text{OCHO}} \quad (12)$$

122 with  $n = 1-3$  using the  $3 \times 3$  unit cell representing coverages of 0.11ML to 0.33 ML and with  $n = 1$  using the  $2 \times 2$   
 123 unit cell to represent coverages of 0.25 ML.  $*[\text{COOH}-n\text{OCHO}]$  means both COOH and  $n$  OCHO are adsorbed  
 124 in the same unit cell.

## 125 **CO<sub>2</sub> Reduction**

126 Similarly, the adsorption energetics were calculated for the reduction reaction, i.e. the production of formic acid  
 127 from CO<sub>2</sub>. This time the reference state is based on CO<sub>2</sub> (g), protons, and electrons. All the gas-phase corrections  
 128 for CO<sub>2</sub>(g) and CO (g) are included as discussed above, and the CHE model is used for the coupled proton and  
 129 electron transfer.

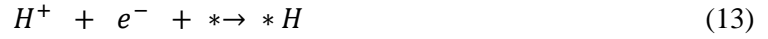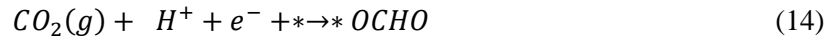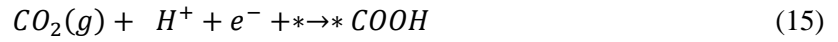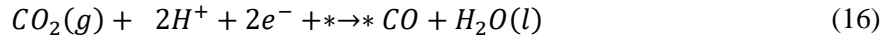

130 The free energies of adsorption are then calculated as shown below.

$$G_{*H}^{ads} = G_{*H} - \frac{1}{2}G_{\text{H}_2(g)} - G_* \quad (17)$$

$$G_{*OCHO}^{ads} = G_{*OCHO} - G_{\text{CO}_2(g)} - \frac{1}{2}G_{\text{H}_2(g)} - G_* \quad (18)$$

$$G_{*COOH}^{ads} = G_{*COOH} - G_{\text{CO}_2(g)} - \frac{1}{2}G_{\text{H}_2(g)} - G_* \quad (19)$$

$$G_{*CO}^{ads} = G_{*CO} + G_{\text{H}_2\text{O}(l)} - G_{\text{CO}_2(g)} - G_{\text{H}_2(g)} - G_* \quad (20)$$

131

132 The limiting potentials for the first protonation step during CO<sub>2</sub> reduction reaction to \*COOH are calculated at  
 133 the potential when the  $G_{*COOH}^{ads} = 0$  as show in in Eq.27.

134

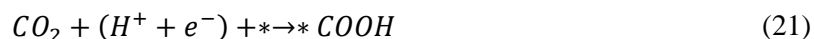

135

$$G_{*COOH}^{ads} = G_{*COOH} - G_{CO_2(g)} - \frac{1}{2}G_{H_2(g)} - G_* + |e|U \quad (22)$$

136

$$U = \frac{G(CO_2(g)) + \frac{1}{2}G(H_2(g)) + G(*COOH) + G(*)}{1|e|} \quad (23)$$

137 Table S1 shows the free energies adsorption for \*COOH, the precursor of \*CO, with H-up and H-down (see  
 138 Figure S6), calculated from HCOOH (aq), Eq. (7), and from CO<sub>2</sub> (g), Eq. (19), at 1/9 ML coverage on Pd<sub>ML</sub>Pt(111),  
 139 Pt(111) and Pd(111).

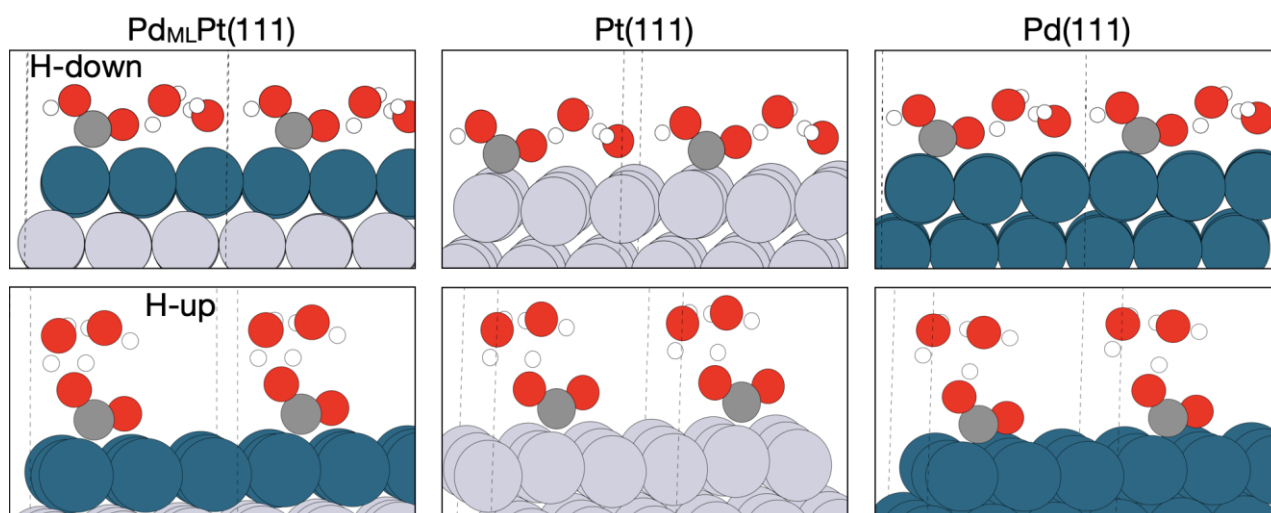

140

141 Figure S5: Illustration of \*COOH solvated with two explicit water molecules with hydrogen down (H-down)  
 142 and hydrogen up (H-up) configuration on the Pd<sub>ML</sub>Pt(111), Pt(111), and Pd(111) surfaces. The boundary of the  
 143 unit cell is delineated by the vertical dashed line, and each figure shows two-unit cells of 3x3.

144 Table S1: Free energies of adsorption for solvated \*COOH with H-up and H-down configuration at 1/9 ML  
 145 coverage calculated for formic acid oxidation reaction, and for CO<sub>2</sub> reduction reaction, where HCOOH (aq) or  
 146 CO<sub>2</sub> (g) are the reference state respectively. Energies are in eV.

|                                       | Pd <sub>ML</sub> Pt(111) | Pt(111) | Pd(111) |
|---------------------------------------|--------------------------|---------|---------|
| COOHup-sol from HCOOH (aq)            | -0.15                    | -0.48   | -0.10   |
| COOHdown-sol from HCOOH (aq)          | -0.37                    | -0.63   | -0.29   |
| COOHup-sol from CO <sub>2</sub> (g)   | -0.003                   | -0.34   | 0.04    |
| COOHdown-sol from CO <sub>2</sub> (g) | -0.23                    | -0.49   | -0.15   |



147

148 **Effect of hydrogen coverage on the free energy of \*COOH**

149

150 We investigated the influence of the hydrogen coverage on the adsorption energy of \*COOH-sol, the precursor  
 151 of \*CO formation, on the three different surfaces. The energy of \*COOH-sol is described further below in the  
 152 solvation effects section. Basically, the solvation energy is added to the free energies of the systems in vacuum.  
 153 The free energies were calculated following the equations below, \*nH represents the surface with n number of  
 154 adsorbed hydrogens per unit cell. The hydrogen coverages investigated were 1/3 ML and 1ML.

155 From Figure S6 we can see that the effect of hydrogen coverage on the adsorption energy of \*COOH-sol is a  
 156 decrease in its binding energy, as expected due to repulsion interactions, but comparing between the three  
 157 surfaces \*COOH-sol adsorbs on Pt(111) stronger.

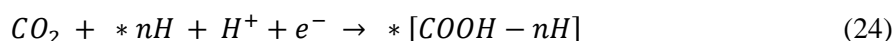

$$G_{*[COOH-nH]}^{ads} = G_{*[COOH-nH]} - G_{CO_2} - G_{*nH} - \frac{1}{2}G_{H_2(g)} \quad (25)$$

158

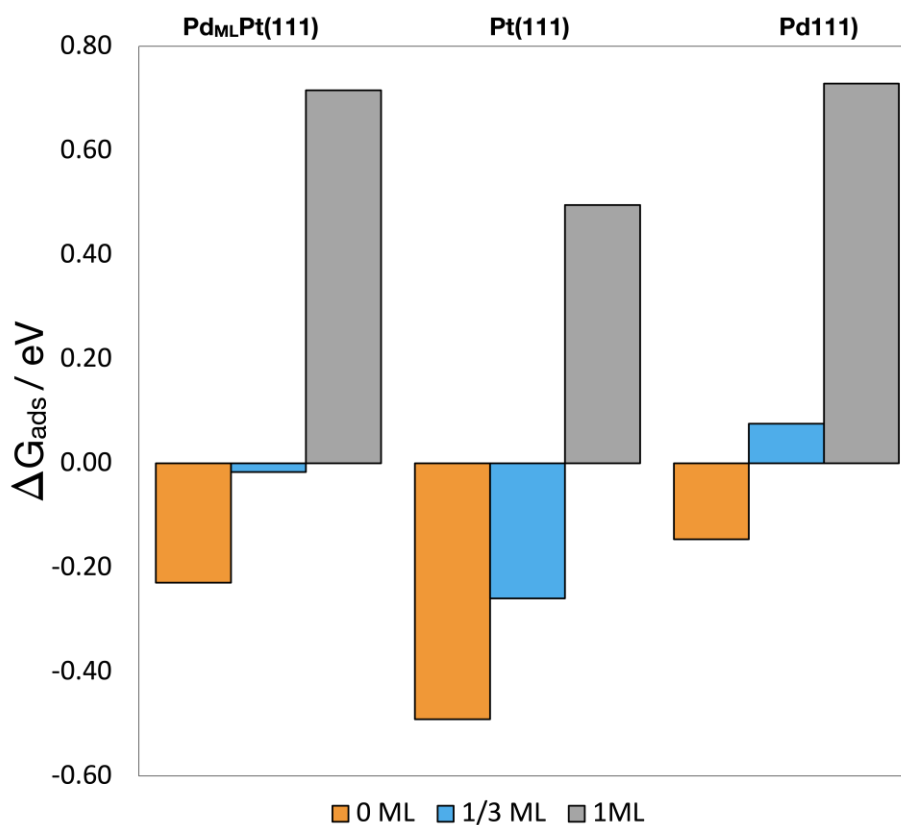

159

160 Figure S6: Free energy of adsorption of \*COOH in the absence (orange) and presence of different coverages of  
 161 co-adsorbed hydrogen 1/3 ML (blue) and 1 ML (grey) on Pd<sub>ML</sub>Pt(111), Pt(111) and Pd(111) at 0 V vs RHE ,  
 162 the solvation energy is added to \*COOH in all cases as explained in the solvation effects section.

### 163 Solvation effects

#### 164 Solvation effect on \*COOH

165 We consider the effect of solvation on the adsorption of \*COOH by solvating \*COOH with 2 explicit water  
 166 molecules, named as \*COOH-sol. Adsorbed water bilayer and solution-phase formic acid were used as the  
 167 reference states, see Eq. (26 for formic acid oxidation, while for the reduction reaction we use adsorbed water,  
 168 CO<sub>2</sub> (g), and protons and electrons, Eq. (27). The adsorbed water reference state is the adsorbed water in the ice-  
 169 like structure in a 3x3 unit cell, while in 2x2 unit cell we used a reference state of 4 adsorbed hydrogen bonded  
 170 water molecules. The following equations correspond to n=6 in the 3x3 unit cell and n=4 in the 2x2 unit cell.

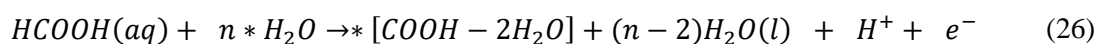

171

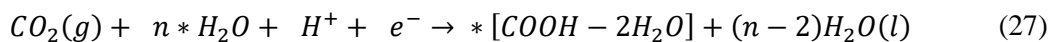

172 The solvation energy of adsorbed \*COOH,  $\Omega_{*COOH}$ , is the difference between the non-solvated and solvated  
 173 free energies of \*COOH. That difference gives Eq. (28) and the solvation energy is Eq. (29)

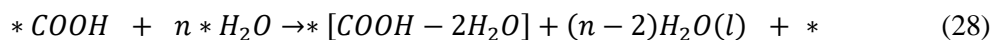

174

$$\Omega_{*COOH} = G_{*[COOH-2H_2O]} + (n - 2)G_{H_2O(l)} + G_* - G_{*COOH} - n G_{*H_2O} \quad (29)$$

175 The solvation energy,  $\Omega_{*COOH}$ , calculated here is an estimate to capture the effect of solvation of coadsorbed  
 176 \*COOH with \*OCHO, that is \*[COOH-nOCHO], and to capture the effect of coadsorbed \*COOH with  
 177 hydrogen \*[COOH-nH]. To account for such solvation effects, the solvation energy is added to the final free  
 178 energy of adsorption as,  $G_{*[COOH-nOCHO]}^{ads} + \Omega_{*COOH}$ , and  $G_{*[COOH-nH]}^{ads} + \Omega_{*COOH}$  and represents an upper  
 179 bound estimate of the solvation effect.

180 Table S2 shows the solvation energies determined for \*COOH with H-up and H-down configuration at both 1/9  
 181 ML and 1/4 ML coverages on Pd<sub>ML</sub>Pt(111), Pt(111) and Pd(111) surfaces. We determine 3 different solvation  
 182 energies following Eq. (29). For example, H-down vac to Hup-sol, means that the reference state (\*COOH) is  
 183 adsorbed \*COOH with hydrogen down configuration in vacuum (H-down vac), and the solvated \*COOH is  
 184 with hydrogen in the up configuration (Hup-sol). At high coverages 1/4 ML \*COOH, higher stabilization (more  
 185 negative solvation energies) is achieved for the \*COOH with H up configuration, while at low coverages higher  
 186 stabilization is achieved for H down-vac to H down-sol. The reason for this might be more predominant  
 187 repulsive interactions than solvation stabilization at higher coverages than at low coverages.

189 Table S2: Calculated solvation energies for \*COOH adsorbate on Pd<sub>ML</sub>Pt(111), Pt(111), Pd(111), at 1/9 ML  
 190 and 1/4 ML coverages following Eq. (29). The solvation energies were calculated following different positions  
 191 of the hydrogen on \*COOH, where the H of the OH group could be on the H-down position or up.

| 3x3-111 (1/9 ML)         | Pd <sub>ML</sub> Pt(111)  | Pt(111) | Pd(111) |
|--------------------------|---------------------------|---------|---------|
| H down vac to H up-sol   | -0.30                     | -0.47   | -0.35   |
| H up vac to H up-sol     | -0.38                     | -0.59   | -0.46   |
| H down vac to H down-sol | -0.53                     | -0.62   | -0.54   |
| 2x2-111 (1/4 ML)         | Pd <sub>ML</sub> Pt(111)) | Pt(111) | Pd(111) |
| H down vac to H up-sol   | -0.17                     | -0.20   | -0.28   |
| H up vac to H up-sol     | -0.33                     | -0.44   | -0.42   |
| H down vac to H down-sol | -0.13                     | -0.12   | -0.29   |

192 In summary, \*COOH is preferably adsorbed with a H-down type configuration at least up to 0.25 ML coverage  
 193 of formate. Once the coverage of formate is increased to 0.33ML, \*COOH with H-up configuration is more  
 194 favorable. Therefore, in the coadsorbed system, where \*COOH is co-adsorbed with 0.33 ML of \*OCHO, we  
 195 corrected for solvation with the solvation energy determined for the \*COOH with H-up configuration.

196 \*COOH coadsorbed with 1ML of hydrogen prefers to adsorb with H down configuration. For Pd and  
 197 Pd<sub>ML</sub>Pt(111) it is ~0.2 eV more favorable than H-down, while for Pt (111) is more favorable by ~ 0.04 eV.  
 198 Therefore, we corrected the energy of the coadsorbed system with the solvation energy determined for \*COOH  
 199 with H-down configuration.

200 Again, these solvation corrections are an upper bound estimation of the solvation effect on \*COOH.

## 201 Solvation effects on \*OCHO

202 Formate retains partial negative charge upon adsorption; to assess whether or not adsorbed formate might benefit  
 203 from solvation, we determine its solvation energy with 1, 2, and 3 explicit water molecules following the  
 204 assessment described in ref <sup>11</sup>. Briefly, the adsorbate in question can benefit from solvation via hydrogen  
 205 bonding if the difference between solvation energy with (n) number of water molecules and (n-1) is more  
 206 negative than the water-self solvation energy on that surface,  $\Omega^n - \Omega^{n-1} \leq \Omega_{\text{H}_2\text{O}}$ , (where,  $\Omega$ , refers to solvation  
 207 energy). The water-self solvation energy was calculated as the difference in free energy between one water  
 208 molecule at 1/9 ML and a water molecule within the water bilayer at 2/3 ML coverage. For Pt(111) that  
 209 difference is -0.29 eV, for Pd<sub>ML</sub>Pt(111) it is -0.18 eV and for Pd it is -0.14 eV. From column  $\Delta 2$  w-1w in Table  
 210 S3, the difference in solvation energies of formate with two and one water molecules is higher than the water  
 211 self-solvation, on all surfaces respectively, suggesting that solvation with one water molecule is enough. This  
 212 solvation energy is an upper bound estimation of the solvation effect on formate.

213 The reference state to calculate the solvation energy is the adsorbed water bilayer in the 3x3 (111) unit cell,  
 214 at 2/3 ML coverage, and the solvation energy is the difference between the free energy of the solvated formate  
 215 and the non-solvated formate,  $\Omega_{*\text{OCHO}}$ .

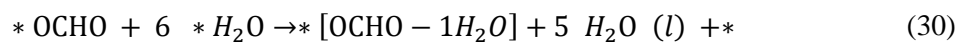

$$\Omega_{*\text{OCHO}} = G_{*[\text{OCHO}-1\text{H}_2\text{O}]} + 5G_{\text{H}_2\text{O}(l)} + G_* - G_{*\text{OCHO}} - 6 G_{*\text{H}_2\text{O}} \quad (31)$$

216 Table S3: Calculated solvation energies for adsorbed formate at 1/9 ML with 1, 2, and 3 water molecules. Last  
 217 two columns show the difference between, 2 H<sub>2</sub>O molecules (2w) and 1 H<sub>2</sub>O molecules, and between 3 H<sub>2</sub>O  
 218 (3w) and 2 H<sub>2</sub>O molecules.

| Surface                   | 1 H <sub>2</sub> O | 2 H <sub>2</sub> O | 3 H <sub>2</sub> O | $\Delta$ 2 w-1w | $\Delta$ 3 w-2w |
|---------------------------|--------------------|--------------------|--------------------|-----------------|-----------------|
| Pd <sub>ML</sub> Pt (111) | -0.50              | -0.27              | -0.24              | 0.23            | 0.03            |
| Pt (111)                  | -0.39              | -0.23              | --                 | 0.16            | --              |
| Pd (111)                  | -0.51              | -0.25              | -0.24              | 0.26            | 0.01            |

### 219 Dipole moments and Bader partial charges

220 Bader partial charge analysis was performed with the Atoms in Molecules, AIM, Bader analysis,<sup>12,13</sup> using the  
 221 Bader program from Henkelman's group.<sup>14</sup>

222 Table S4: Dipole moments and Bader partial charges for various adsorbates on Pd<sub>ML</sub>Pt(111), Pt(111) and Pd(111)  
 223 at 1/9 ML coverage unless specified otherwise. [a] Total partial Bader charge of hydrogens adsorbed on the  
 224 surface on the fcc sites, and [b] partial Bader charge of only \*COOH.

| adsorbate      | $\Delta\mu / e^* \text{\AA}$ |         |         | $ q  / e^-$              |         |         |
|----------------|------------------------------|---------|---------|--------------------------|---------|---------|
|                | Pd <sub>ML</sub> Pt(111)     | Pt(111) | Pd(111) | Pd <sub>ML</sub> Pt(111) | Pt(111) | Pd(111) |
| H-fcc          | 0.02                         | -0.01   | 0.01    | -0.09                    | -0.03   | -0.08   |
| H-top          | 0.03                         | -0.03   | 0.02    | 0.00                     | 0.04    | 0.00    |
| CO             | 0.18                         | -0.03   | 0.17    | -0.23                    | -0.01   | -0.22   |
| OCHO           | -0.06                        | -0.23   | -0.07   | -0.50                    | -0.40   | -0.48   |
| COOH- H up     | -0.24                        | -0.16   | -0.25   | -0.22                    | -0.16   | -0.19   |
| COOH- H down   | 0.06                         | 0.21    | 0.06    | -0.14                    | 0.01    | -0.10   |
| COOH-Hup sol   | -0.23                        | -0.18   | -0.29   | -0.20                    | -0.12   | -0.17   |
| COOH-Hdown sol | 0.06                         | -0.35   | -0.17   | -0.15                    | -0.08   | -0.11   |

|                                 |       |       |       |       |       |       |
|---------------------------------|-------|-------|-------|-------|-------|-------|
| OCHO-sol                        | -0.25 | -0.41 | -0.24 | -0.58 | -0.39 | -0.39 |
| 1/3 ML Hads-fcc                 | 0.06  | -0.03 | 0.04  | -0.25 | -0.06 | -0.21 |
| 1 ML Hads-fcc                   | 0.09  | -0.17 | 0.06  | -0.56 | -0.07 | -0.51 |
| <sup>a</sup> 1/3 ML *H in *COOH | 0.12  | 0.18  | 0.15  | -0.19 | -0.05 | -0.19 |
| <sup>a</sup> 1 ML *H in *COOH   | 0.24  | 0.05  | 0.20  | -0.61 | -0.05 | -0.48 |
| <sup>b</sup> *COOH in 1/3 ML *H | --    | --    | --    | -0.08 | -0.01 | -0.04 |
| <sup>b</sup> *COOH in 1 ML *H   | --    | --    | --    | 0.03  | 0.02  | 0.07  |

## 225 Work functions

226 Work functions,  $\Phi$ , were determined as,  $\Phi = V - E_{Fermi}$ , the difference between the Fermi energy and the  
227 one electron potential in vacuum.

228 Table S5: Calculated work function for the bare surfaces, Pd<sub>ML</sub>Pt(111), Pt(111) and Pd(111), and at different  
229 hydrogen coverages.

|        | $\Phi/$ eV               |          |          |
|--------|--------------------------|----------|----------|
|        | Pd <sub>ML</sub> Pt(111) | Pt (111) | Pd (111) |
| Bare   | 5.14                     | 5.74     | 5.29     |
| 1/9 ML | 5.20                     | 5.71     | 5.32     |
| 1/3 ML | 5.33                     | 5.64     | 5.37     |
| 1ML    | 5.45                     | 5.20     | 5.42     |

230

## 231 References

- 232 1. Wakisaka, M., Asizawa, S., Uchida, H. & Watanabe, M. In situ STM observation of morphological changes  
233 of the Pt(111) electrode surface during potential cycling in 10 mM HF solution. *Phys. Chem. Chem. Phys.*  
234 **12**, 4184–4190 (2010).
- 235 2. Álvarez, B., Climent, V., Rodes, A. & Feliu, J. M. Anion adsorption on Pd–Pt(111) electrodes in sulphuric  
236 acid solution. *J. Electroanal. Chem.* **497**, 125–138 (2001).

- 237 3. Soriaga, M., Stickney, J., Bottomley, L. & Kim, Y. *Thin Films: Preparation, Characterization,*  
238 *Applications.* (Springer US, 2002).
- 239 4. Álvarez, B., Berná, A., Rodes, A. & Feliu, J. M. Electrochemical properties of palladium adlayers on Pt(100)  
240 substrates. *Surf. Sci.* **573**, 32–46 (2004).
- 241 5. Chase, Jr., M. W. *et al.* NIST-JANAF Thermochemical Tables. *J. Phys. Chem. Ref. Data* **Suppl. 1 to Vol.**  
242 **14**, 1856 (1985).
- 243 6. Peterson, A. A., Abild-Pedersen, F., Studt, F., Rossmeisl, J. & Nørskov, J. K. How copper catalyzes the  
244 electroreduction of carbon dioxide into hydrocarbon fuels. *Energy Environ. Sci.* **3**, 1311–1315 (2010).
- 245 7. Christensen, R., Hansen, H. A. & Vegge, T. Identifying systematic DFT errors in catalytic reactions. *Catal.*  
246 *Sci. Technol.* **5**, 4946–4949 (2015).
- 247 8. Granda-Marulanda, L. P. *et al.* A Semiempirical Method to Detect and Correct DFT-Based Gas-Phase  
248 Errors and Its Application in Electrocatalysis. *ACS Catal.* **10**, 6900–6907 (2020).
- 249 9. Bratsch, S. G. Standard Electrode Potentials and Temperature Coefficients in Water at 298.15 K. *J. Phys.*  
250 *Chem. Ref. Data* **18**, 1–21 (1989).
- 251 10. Nørskov, J. K. *et al.* Origin of the Overpotential for Oxygen Reduction at a Fuel-Cell Cathode. *J. Phys.*  
252 *Chem. B* **108**, 17886–17892 (2004).
- 253 11. Rendón-Calle, A., Builes, S. & Calle-Vallejo, F. Substantial improvement of electrocatalytic predictions  
254 by systematic assessment of solvent effects on adsorption energies. *Appl. Catal. B Environ.* **276**, 119147  
255 (2020).
- 256 12. Bader, R. F. W. *Atoms in molecules: a quantum theory.* (Clarendon Press, 1994).
- 257 13. Bader, R. F. W. Atoms in molecules. *Acc. Chem. Res.* **18**, 9–15 (1985).

258 14. Henkelman, G., Arnaldsson, A. & Jónsson, H. A fast and robust algorithm for Bader decomposition of  
259 charge density. *Comput. Mater. Sci.* **36**, 354–360 (2006).

260
